# Supplementary material for: Cavity shape transformation during peeling on elastic microchannel-patterned substrates filled with a viscous liquid
Source: Royal Society of Chemistry journal article supplement (doi:10.1039/c7sm00016b), 2017-01-01
Supplement: c7sm00016b2.pdf [file c7sm00016b2.pdf]

## Supporting Information

### **Cavity Shape Transformation During Peeling on Elastic Microchannel-Patterned Substrates Filled with a Viscous Liquid**

Nayantika Chaudhari<sup>†</sup>, Tushar Deshpande<sup>†</sup>, Yogesh R.G. Singh<sup>†</sup>, Sandip Patil<sup>†</sup>, Manish Kulkarni<sup>†</sup>, Janhavi Raut<sup>‡</sup> and Ashutosh Sharma<sup>\*†</sup>

[a\*] Prof. Ashutosh Sharma

Department of Chemical Engineering and Centre for Nanosciences

Indian Institute of Technology

Kanpur-208016, U.P (India)

E-mail: [ashutos@iitk.ac.in](mailto:ashutos@iitk.ac.in)

Telephone: +91-512-2597026

Fax: +91-512-2590104

[b] Dr. Janhavi Raut

Unilever R&D, 64 Main Road,

Whitefield, Bangalore 560066, India

We present additional data on the peel tests carried out with a fixed channel width and varying island areas.

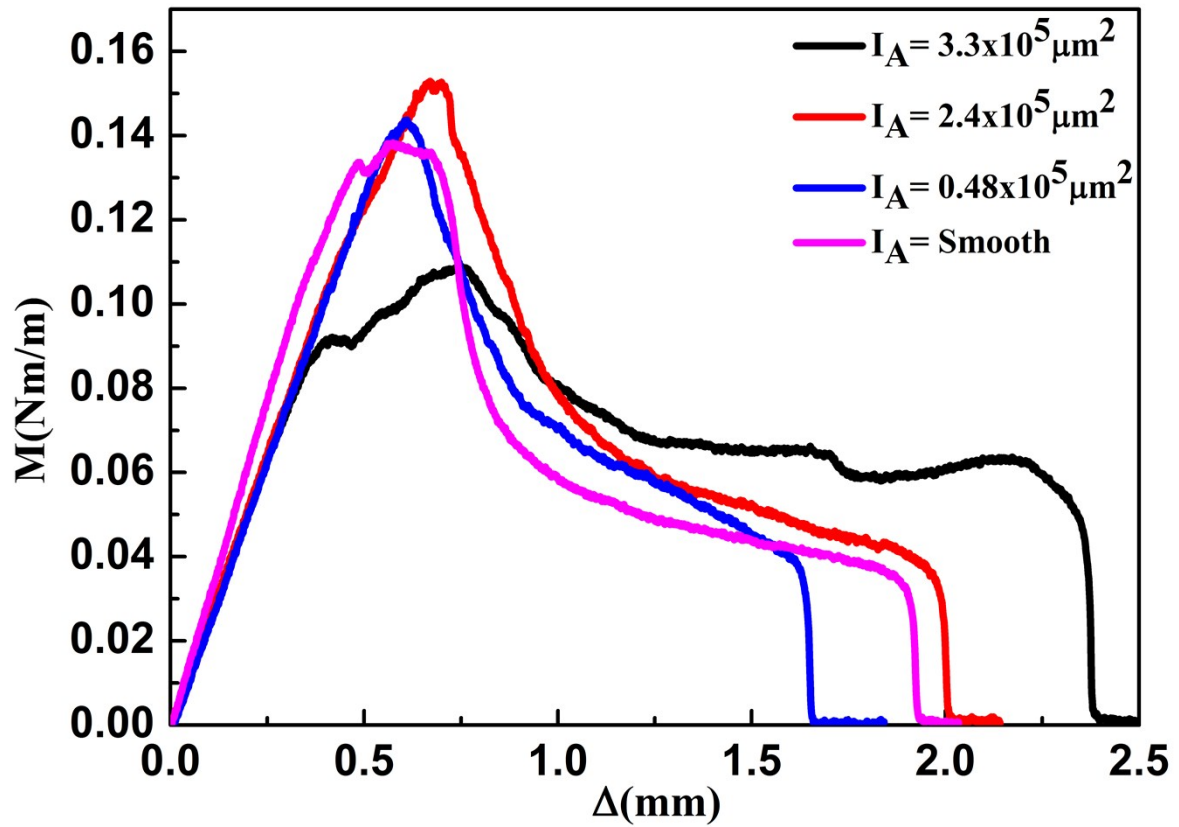

**Figure S1.** Torque-Displacement (M-Δ) curves for liquid filled microchannel PDMS substrates with a fixed channel width of 70  $\mu\text{m}$  ( $C_W < K^{-1}$ ) and various island areas, that is  $0.48 \times 10^5 \mu\text{m}^2$ ,  $2.4 \times 10^5 \mu\text{m}^2$  and  $3.3 \times 10^5 \mu\text{m}^2$ . Curve 1 represents the M-Δ curve for a smooth bilayer. The depth of the microchannels was kept at 35  $\mu\text{m}$ .

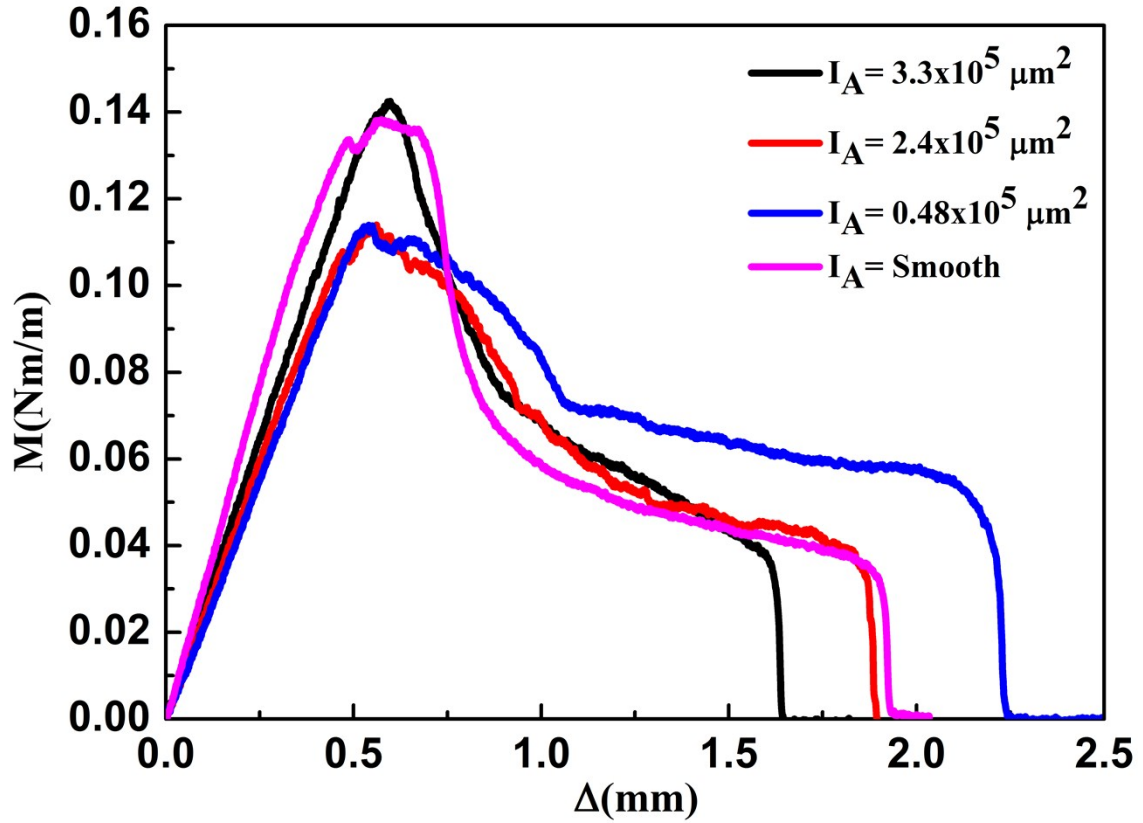

**Figure S2.** Torque-Displacement ( $M$ - $\Delta$ ) curves for liquid filled microchannel PDMS substrates with a fixed channel width of  $320 \mu\text{m}$  ( $C_W > K^{-1}$ ) and various island areas, that is  $0.48 \times 10^5 \mu\text{m}^2$ ,  $2.4 \times 10^5 \mu\text{m}^2$  and  $3.3 \times 10^5 \mu\text{m}^2$ . Curve 1 represents the  $M$ - $\Delta$  curve for a smooth bilayer. The depth of the microchannels was kept constant at  $35 \mu\text{m}$ .

For a channel width of less than  $K^{-1}$  ( $C_W = 70 \mu\text{m}$ ) and varying island area, where capillary confinement is high, the plateau of ( $M$ - $\Delta$ ) curves and extent of detachment as shown in Figure S1 is governed by the elastic contribution of the interface to the peel force and the crack arresting effect. When the island area in channels with a width less than  $K^{-1}$  is increased, the elastic contribution increases, leading to an increase in the extent of detachment. For channel widths above the characteristic decay length  $K^{-1}$  ( $C_W = 320 \mu\text{m}$ ) as evident in Figure S2, the effect of crack arresting is diminished, and the plateau and the extent of detachment is controlled by viscous dissipation at the interface. For these combinations of channel width-island area, the effective viscous dissipation at the contact interface decreases as island area is increased, leading to a shortening of the plateau region.
